# Supplementary material for: Polyoxazoline multivalently conjugated with indocyanine green for sensitive in vivo photoacoustic imaging of tumors
Source: PubMed Central journal article supplement (PMC5036052; doi:10.1038/srep33798), 2016-09-26
Supplement: srep33798-s3.pdf [file srep33798-s3.pdf]

**Supplementary Information:**

**Polyoxazoline multivalently conjugated with  
indocyanine green for sensitive *in vivo* photoacoustic  
imaging of tumors**

Kengo Kanazaki<sup>1,2, ¶</sup>, Kohei Sano<sup>1,3, ¶</sup>, Akira Makino<sup>1,4</sup>, Tsutomu Homma<sup>2</sup>, Masahiro Ono<sup>1</sup>,  
Hideo Saji<sup>1,\*</sup>

<sup>1</sup>Department of Patho-Functional Bioanalysis Graduate School of Pharmaceutical Sciences,  
Kyoto University, 46-29 Yoshida Shimoadachi-cho, Sakyo-ku, Kyoto, Japan, 606-8501

<sup>2</sup>Medical Imaging Project, Corporate R&D Headquarters, Canon Inc., 3-30-2 Shimomaruko,  
Ohta-ku, Tokyo, Japan, 146-8501

<sup>3</sup>Kyoto University Hospital, 54 Kawaharacho, Shogoin, Sakyo-ku, Kyoto, Japan, 606-8507

<sup>4</sup>Biomedical Imaging Research Center, University of Fukui, 23-3 Matsuokashimoaizuki,  
Eiheiji-cho, Yoshida-gun, Fukui, Japan, 910-1193

\* Corresponding author

Hideo Saji, PhD, Professor

E-mail: [hsaji@pharm.kyoto-u.ac.jp](mailto:hsaji@pharm.kyoto-u.ac.jp)

¶ These authors contributed equally to this work.

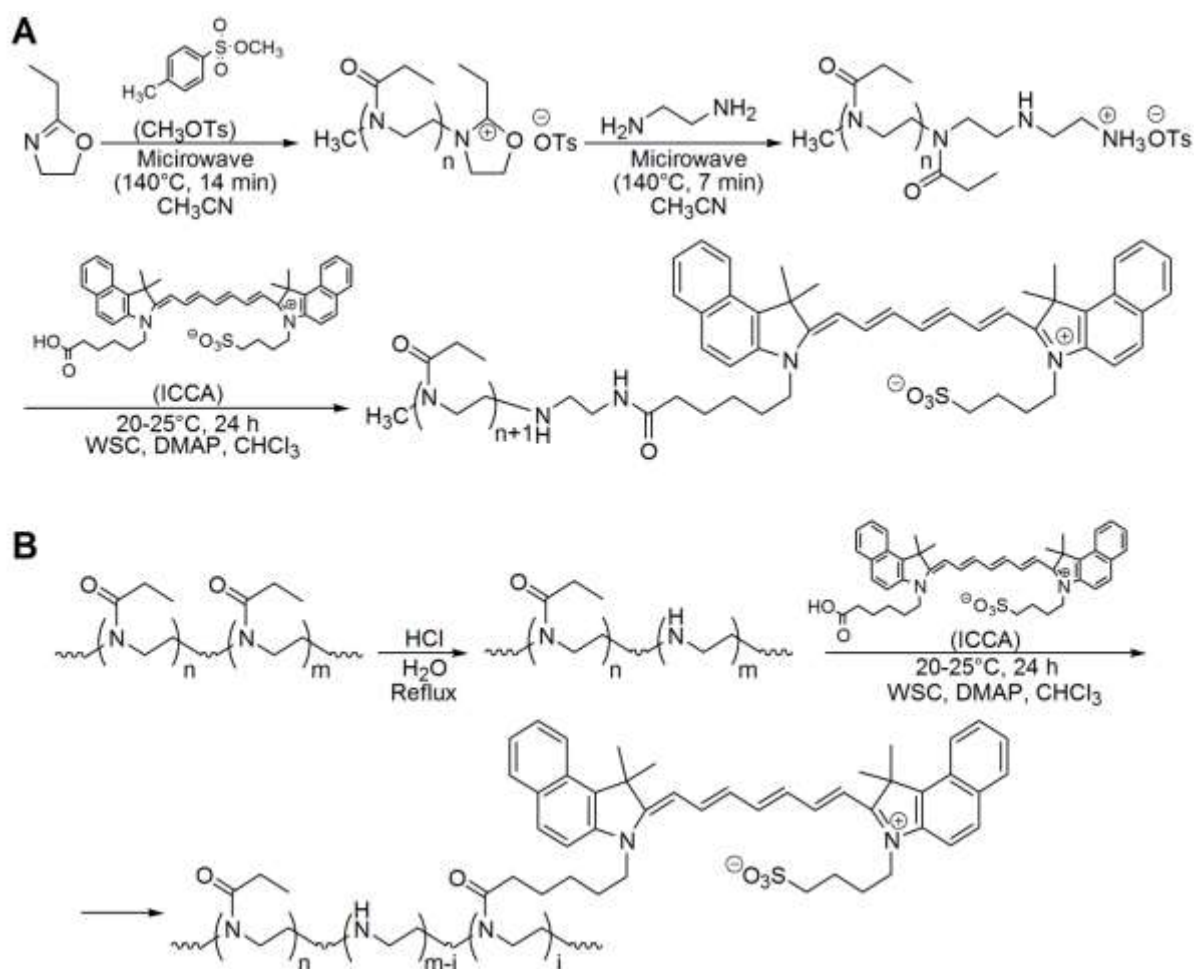

**Figure S1.** The synthesis scheme of POZ-ICG. (A) ICG was introduced into the terminal end of POZ derivatives synthesized *via* microwave irradiation. (B) Multiple ICG molecules were introduced into POZ derivatives whose acyl groups were partially hydrolyzed using hydrochloric acid.

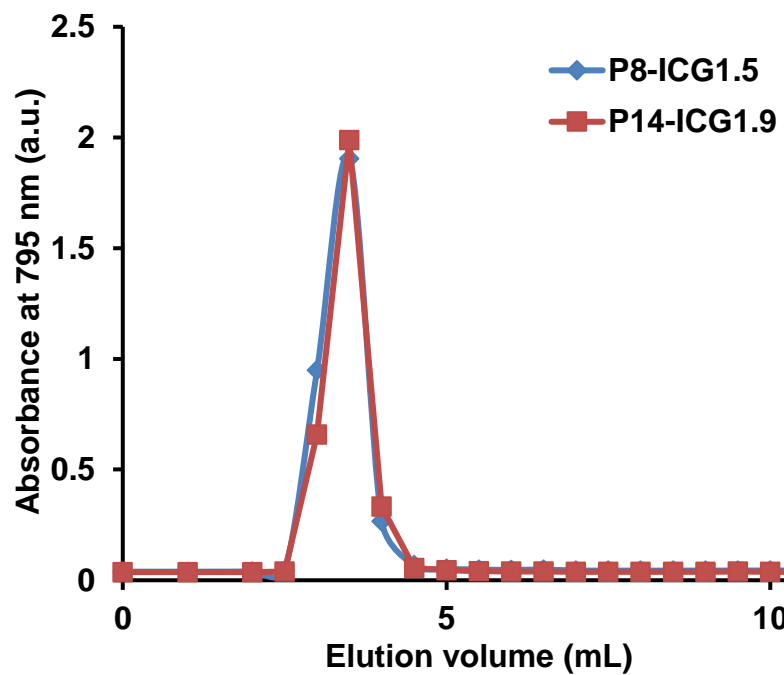

**Figure S2.** Size exclusion chromatography of POZ-ICG with PD-10 column. POZ-ICG was detected by absorbance at 795 nm. Representative charts of P8-ICG1.5 and P14-ICG1.9 were shown. The absorbance of ICG was detected only in high molecular weight fraction (3-4 mL).

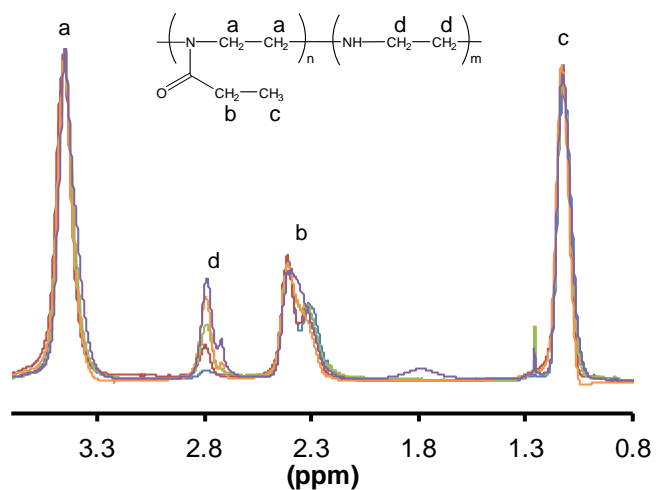

**Figure S3.** NMR spectrum of hydrolyzed POZ. Hydrolysis percentage of POZ was 2.5, 5, 10, 15, and 20% for blue, red, green, orange, and purple lines, respectively.

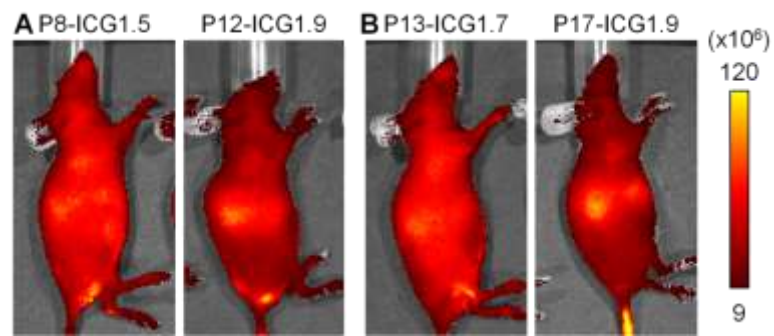

**Figure S4.** *In vivo* fluorescent images of tumor-bearing mice at 1 h after administration with POZ-ICG (A; 25 kDa, B; 50 kDa). (A) Left: P8-ICG1.5, right: P12-ICG1.9. (B) Left: P13-ICG1.7, right: P17-ICG1.9 as shown in Table 2. Scale bar units: photons/sec/cm<sup>2</sup>/steradian.

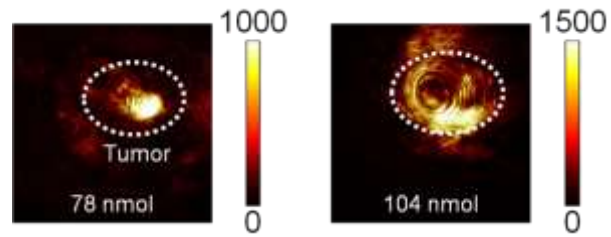

**Figure S5.** Adjusted *In vivo* PA images of tumor-bearing mice at 24 h after administration with POZ-ICG (left: 78 nmol, right: 104 nmol). The color dynamic range in Fig. 5B was adjusted so as to prevent PA signal saturation. Dotted circles indicated the tumor regions. Scale bar units: arbitrary unit.

**Table S1.** *In vivo* biodistribution data of POZ conjugated with multiple ICG molecules.

| Sample      | Hydrolysis ratio (%) | Number of ICG conjugated with POZ | Tumor accumulation (%ID/g) | Probe concentration in the blood (%ID/g) | Tumor-to-blood ratio |
|-------------|----------------------|-----------------------------------|----------------------------|------------------------------------------|----------------------|
| P8-ICG0.7   | 2.5                  | 0.7                               | 7.7±0.2                    | 2.1±0.5                                  | 3.9±0.9              |
| P8-ICG1.5   | 2.5                  | 1.5                               | 8.7±1.2                    | 0.9±0.1                                  | 9.2±2.0              |
| P9-ICG0.6   | 5                    | 0.6                               | 7.9±0.5                    | 1.4±0.2                                  | 5.5±0.3              |
| P9-ICG2.6   | 5                    | 2.6                               | 5.8±0.9                    | 0.4±0.1                                  | 15.4±2.4             |
| P9-ICG5.4   | 5                    | 5.4                               | 3.7±0.2                    | 0.3±0.0                                  | 11.3±0.8             |
| P10-ICG0.6  | 10                   | 0.6                               | 7.5±0.3                    | 0.5±0.1                                  | 14.1±2.1             |
| P10-ICG4.4  | 10                   | 4.4                               | 2.8±0.2                    | 0.1±0.0                                  | 22.7±3.9             |
| P10-ICG8.6  | 10                   | 8.6                               | 1.6±0.1                    | 0.2±0.0                                  | 11.0±3.1             |
| P13-ICG1.7  | 2.5                  | 1.7                               | 7.2±0.5                    | 3.6±0.3                                  | 2.8±0.3              |
| P13-ICG2.8  | 2.5                  | 2.8                               | 8.2±1.8                    | 2.9±0.5                                  | 2.9±0.7              |
| P14-ICG0.5  | 5                    | 0.5                               | 7.6±1.1                    | 2.6±0.2                                  | 2.9±0.5              |
| P14-ICG1.9  | 5                    | 1.9                               | 6.6±1.9                    | 1.8±0.3                                  | 3.6±0.5              |
| P14-ICG4.7  | 5                    | 4.7                               | 9.5±1.4                    | 2.0±0.3                                  | 4.8±1.2              |
| P14-ICG7.8  | 5                    | 7.8                               | 9.4±0.6                    | 1.5±0.1                                  | 6.3±1.0              |
| P14-ICG10.3 | 5                    | 10.3                              | 4.1±0.5                    | 0.6±0.1                                  | 7.6±0.9              |
| P15-ICG1.0  | 10                   | 1.0                               | 7.4±1.2                    | 1.6±0.1                                  | 4.7±0.6              |
| P15-ICG3.6  | 10                   | 3.6                               | 4.7±0.7                    | 0.5±0.1                                  | 8.7±0.4              |
| P15-ICG9.0  | 10                   | 9.0                               | 3.0±0.3                    | 0.1±0.1                                  | 23.4±2.2             |
| P15-ICG10.7 | 10                   | 10.7                              | 3.5±0.6                    | 0.2±0.1                                  | 23.5±7.8             |

**Video S1.** *In vivo* 3D PA image before POZ-ICG administration (also shown in Fig. 5B).

**Video S2.** *In vivo* 3D PA image 24 h after POZ-ICG administration (52 mol) (also shown in Fig. 5C).
